# Supplementary material for: Neuronal excitation-inhibition imbalance in the basolateral amygdala is involved in propofol-mediated enhancement of fear memory
Source: PubMed Central journal article supplement — Commun Biol. 2024 Oct 29;7:1408. doi: 10.1038/s42003-024-07105-5 (PMC11522401; doi:10.1038/s42003-024-07105-5), 2024-10-29

Uncropped and unedited blot images of Chen et al “Neuronal excitation-inhibition imbalance in the basolateral amygdala is involved in propofol-mediated enhancement of fear memory”.

Related to Figure 1d

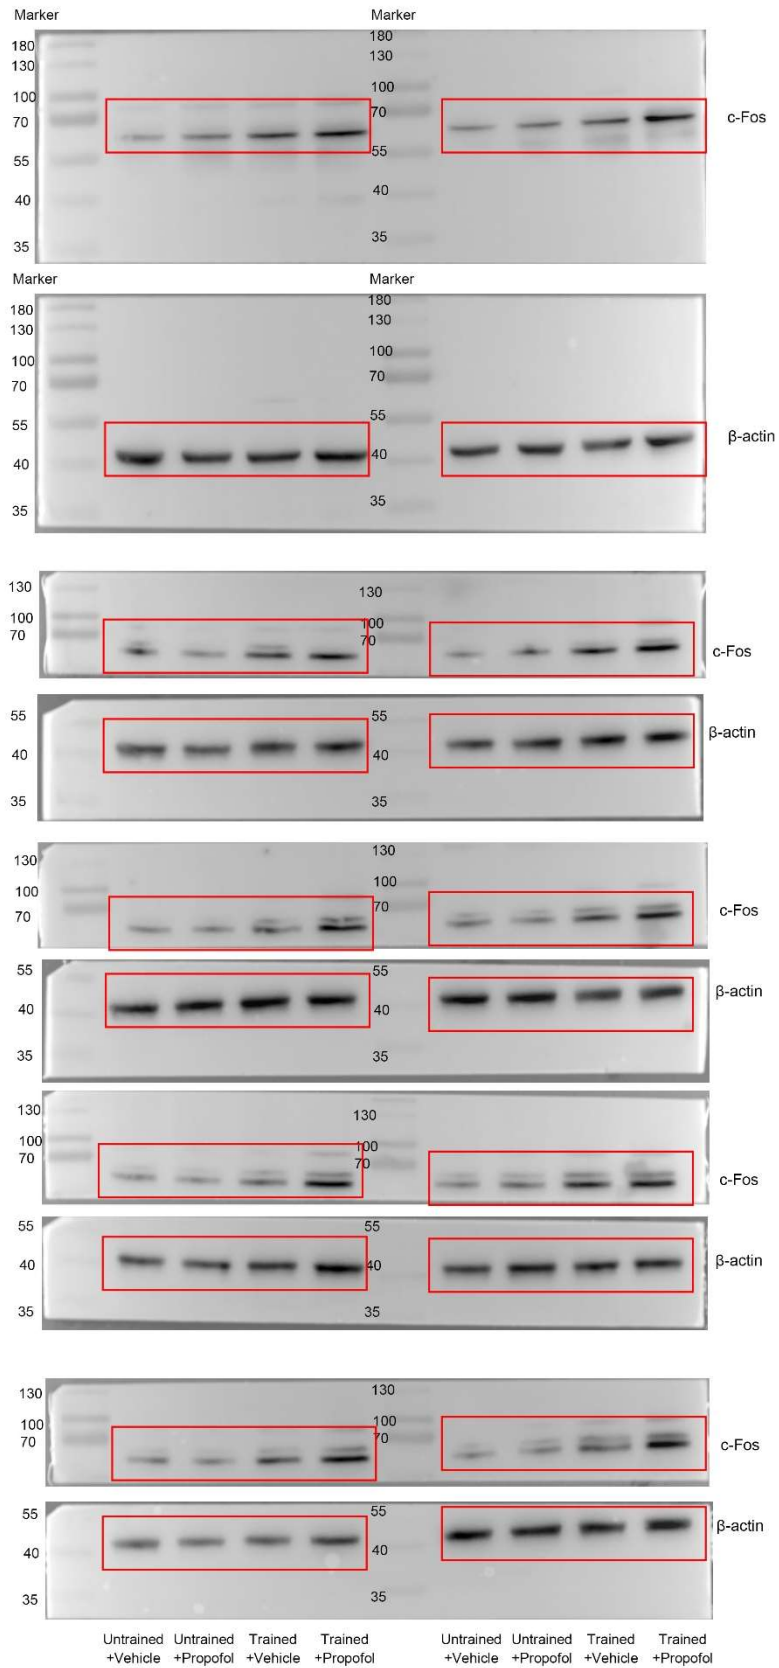

Related to Figure 4d

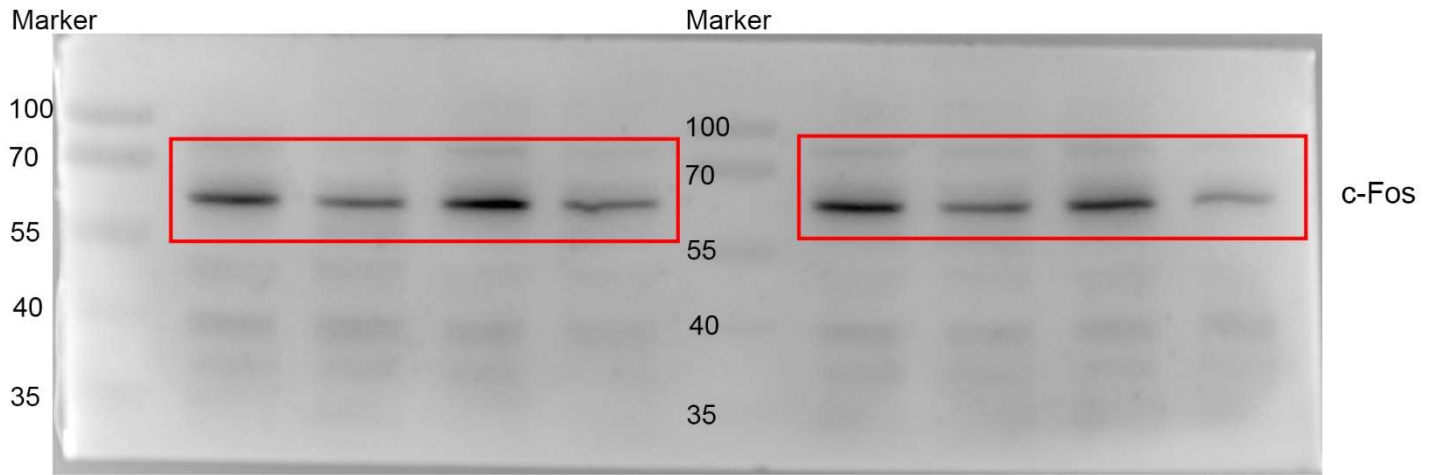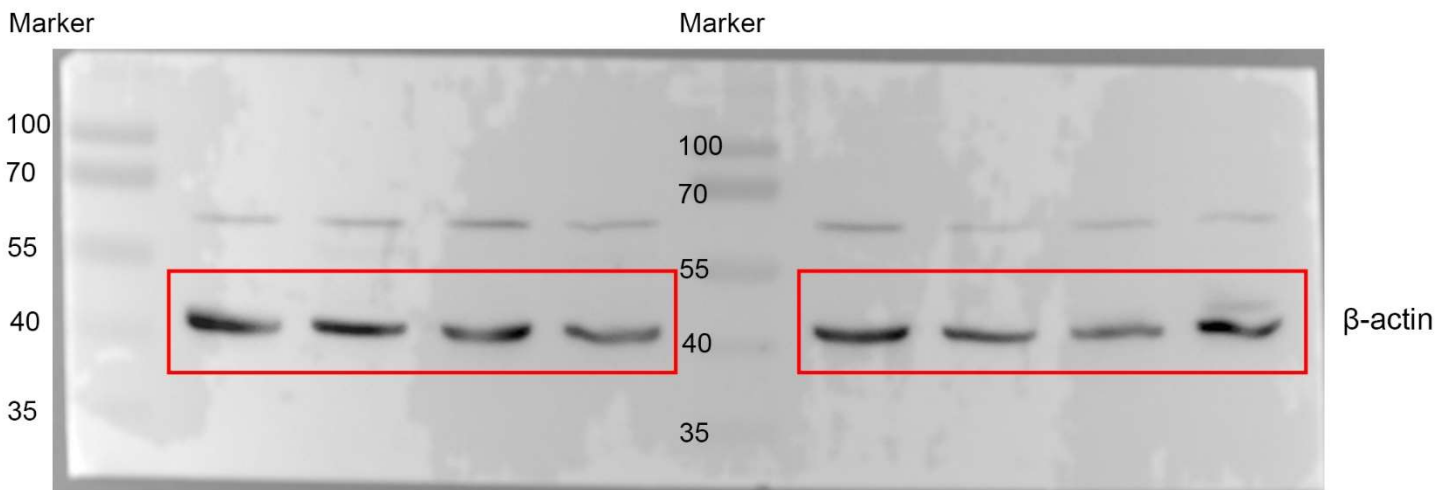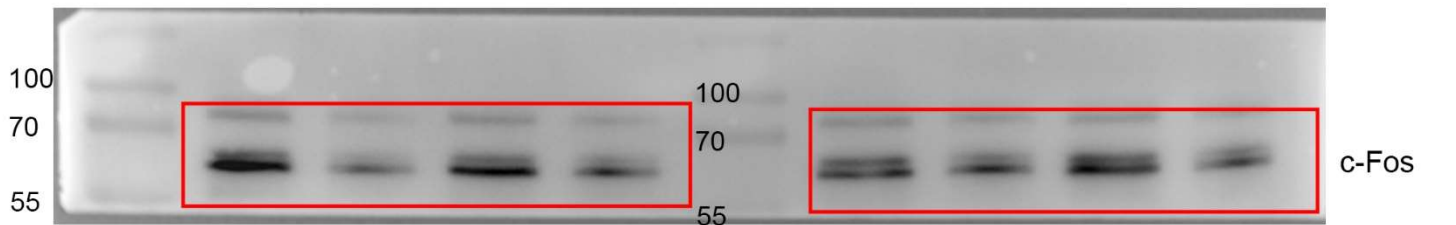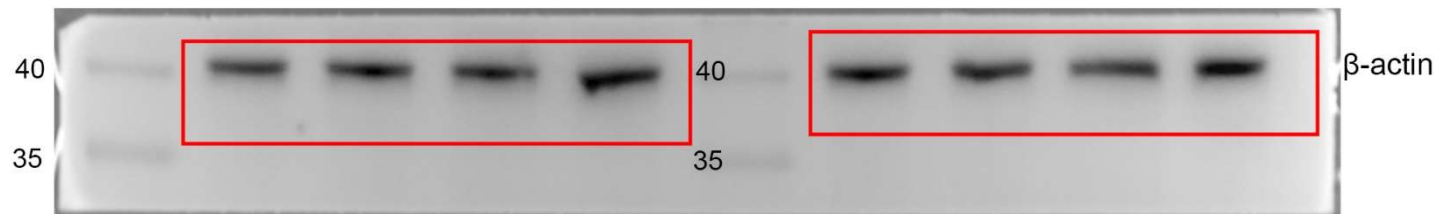

mCherry NpHR mCherry NpHR

mCherry NpHR mCherry NpHR

Related to Figure 5g

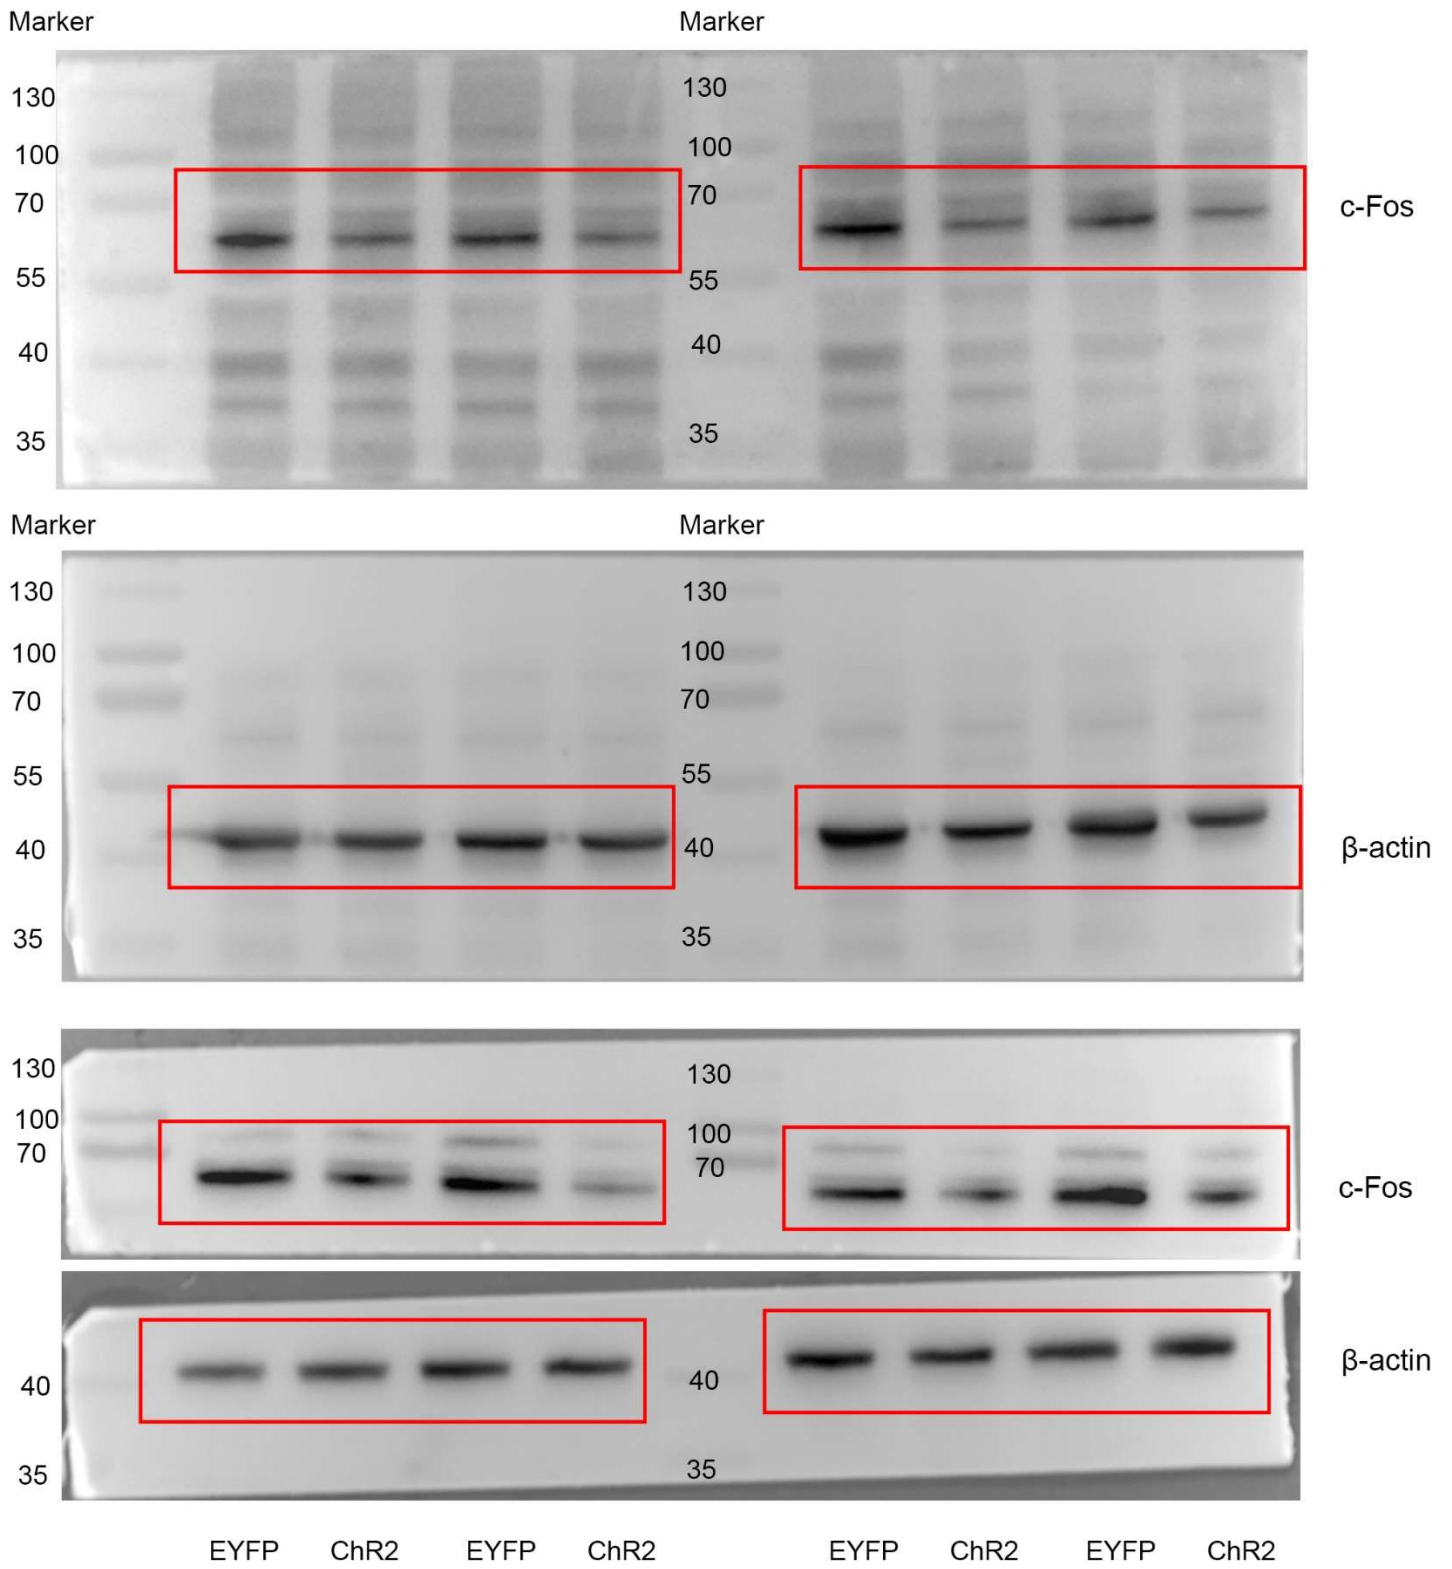

Related to Figure 6e

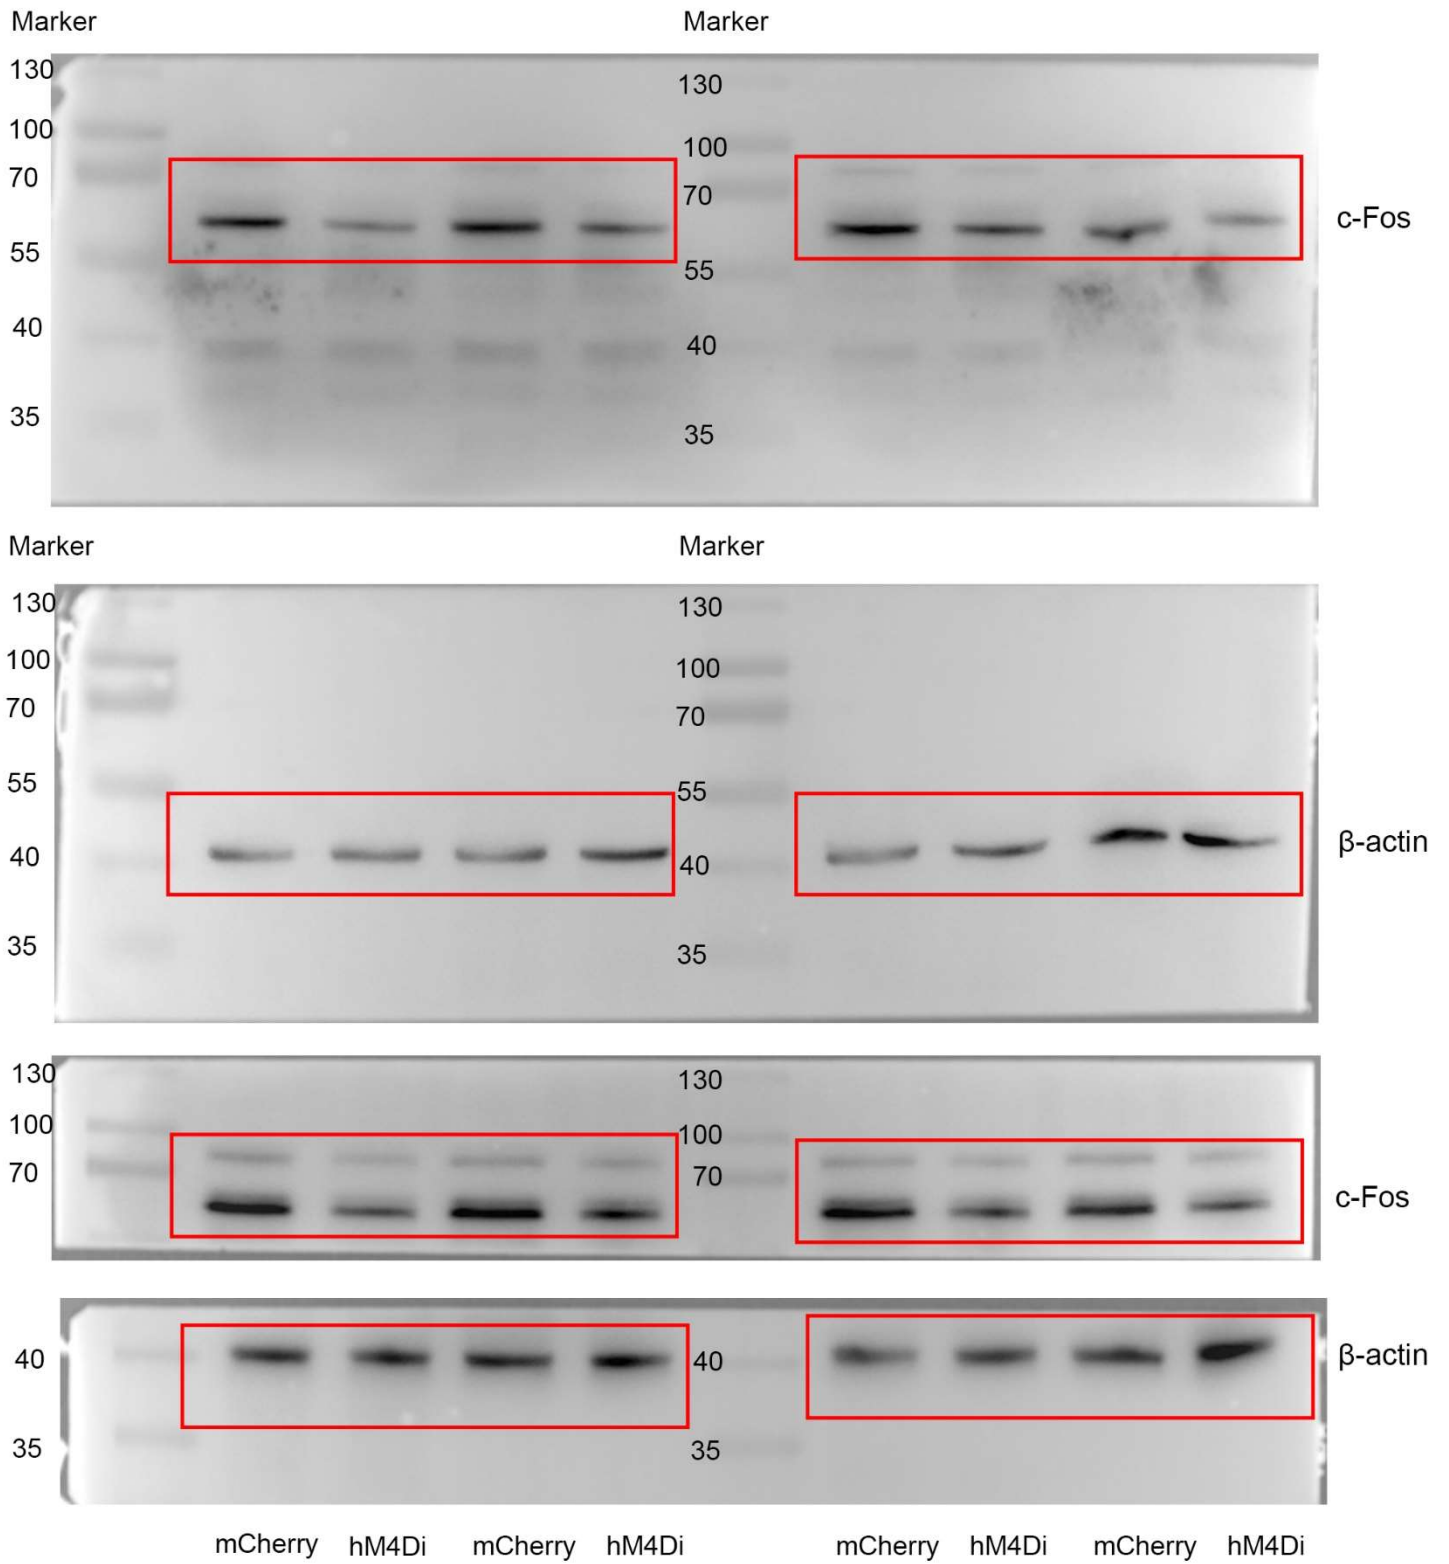

Related to Figure 7g

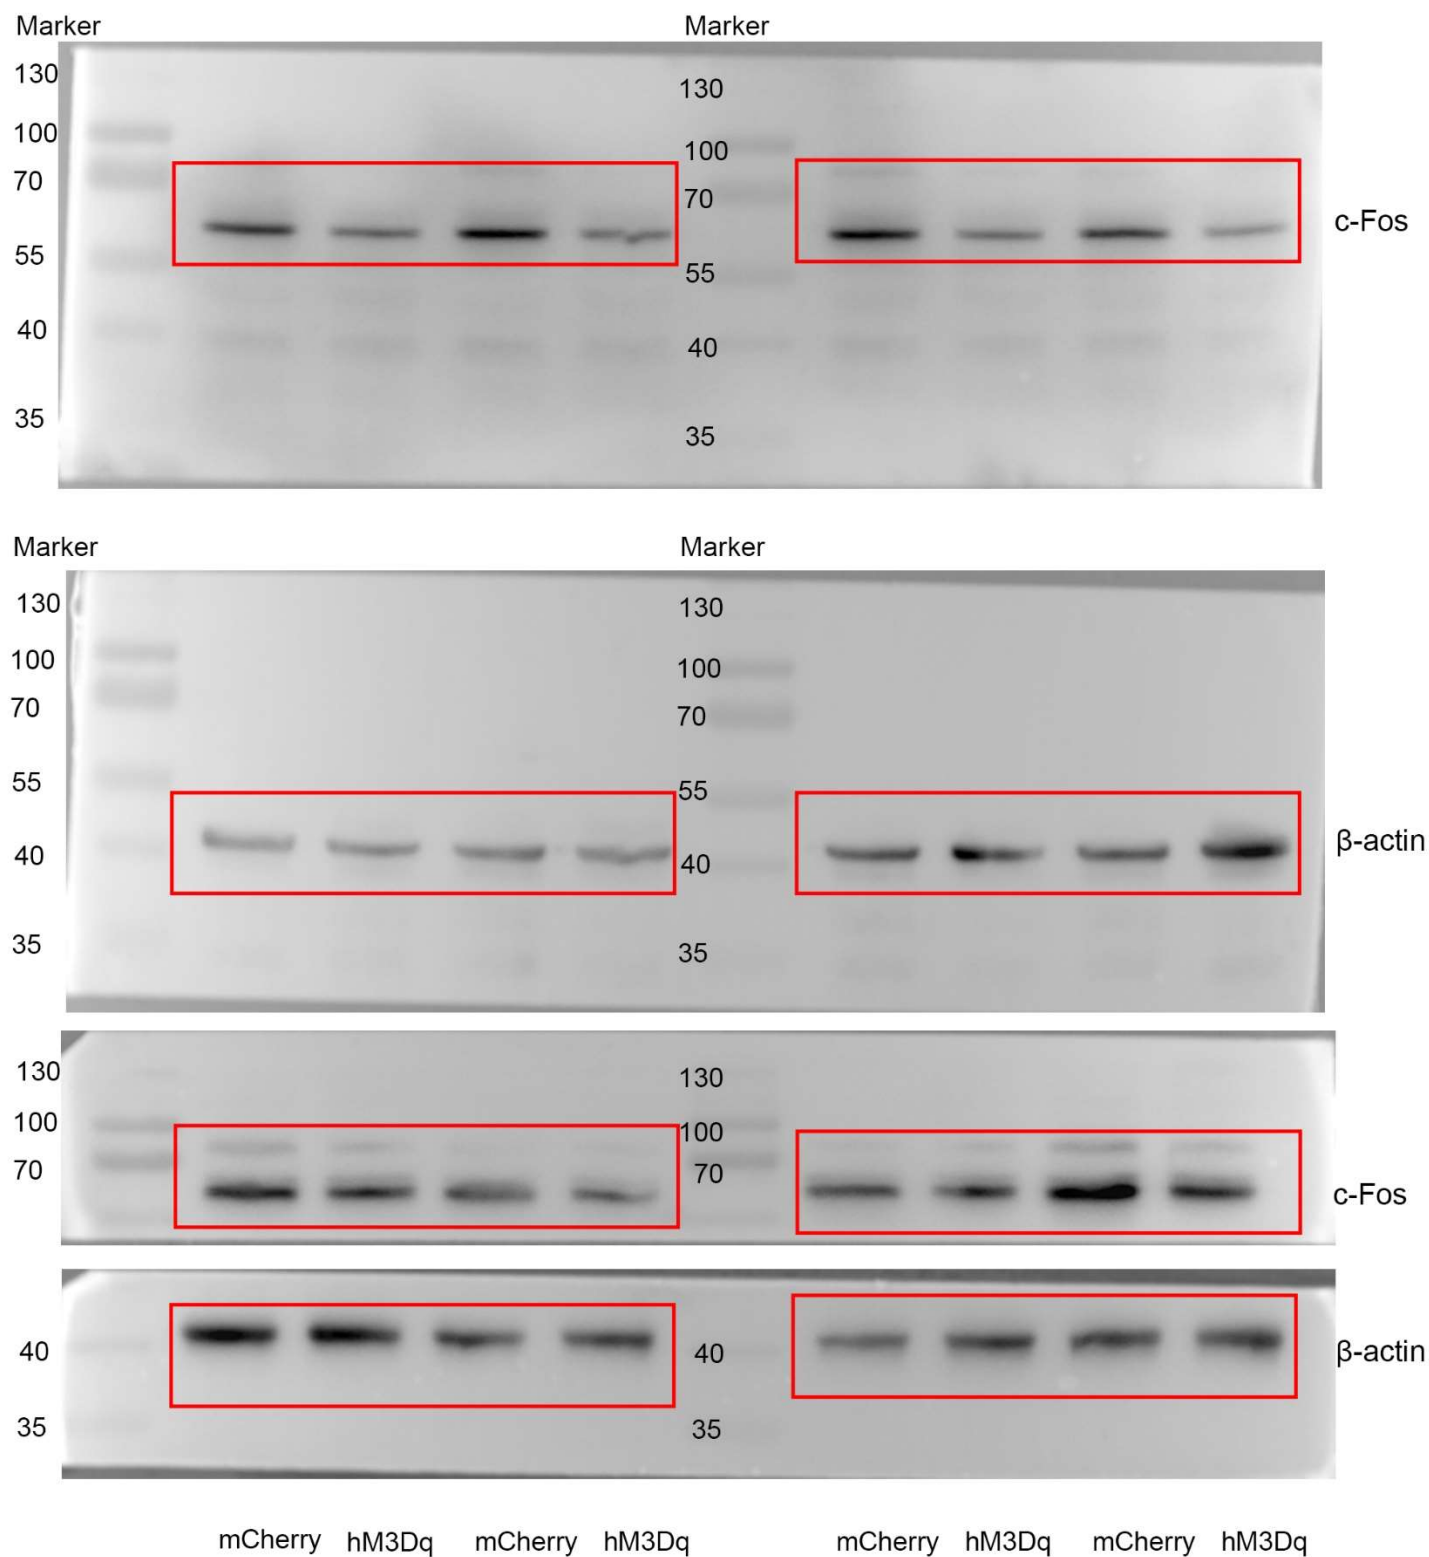

Supplement: 42003_2024_7105_MOESM1_ESM.pdf [file 42003_2024_7105_MOESM1_ESM.pdf]
