# Supplementary material for: Neuronal excitation-inhibition imbalance in the basolateral amygdala is involved in propofol-mediated enhancement of fear memory
Source: PubMed Central journal article supplement — Commun Biol. 2024 Oct 29;7:1408. doi: 10.1038/s42003-024-07105-5 (PMC11522401; doi:10.1038/s42003-024-07105-5), 2024-10-29
Supplement: 42003_2024_7105_MOESM2_ESM.pdf [file 42003_2024_7105_MOESM2_ESM.pdf]

# Description of Additional Supplementary Files

**File name:** Supplementary Data 1

**Description:** The source data behind the graphs in the paper.
